# Supplementary material for: Neuroimaging young children and associations with neurocognitive development in a South African birth cohort study
Source: PubMed Central journal article supplement (PMC7443699; doi:10.1016/j.neuroimage.2020.116846), 2020-10-01
Supplement: mmc1.pdf [file mmc1.pdf]

## Supplementary Material

Supplementary data for Wedderburn *et al.*, Neuroimaging young children and associations with neurocognitive development in a South African birth cohort study.

**Appendix Table 1:** Comparison of socioeconomic variables among children in the neuroimaging sub-group and the full birth cohort (n=1143)

| Variables                             | Final analysis group (n=146) |                    |        | Full imaging cohort (n=239) |                    |        |
|---------------------------------------|------------------------------|--------------------|--------|-----------------------------|--------------------|--------|
|                                       | Imaging (n=146)              | No Imaging (n=997) | P      | Imaging (n=239)             | No Imaging (n=904) | P      |
| Male sex                              | 84 (57.5%)                   | 504 (50.6%)        | 0.115  | 135 (56.5%)                 | 453 (50.1%)        | 0.079  |
| Monthly household income (ZAR)        |                              |                    |        |                             |                    |        |
| < R1000 (<~\$75)                      | 48 (32.9%)                   | 383 (38.4%)        |        | 78 (32.6%)                  | 353 (39.1%)        |        |
| R1000-R5000 (~\$75-375)               | 86 (58.9%)                   | 471 (47.2%)        |        | 139 (58.2%)                 | 418 (46.2%)        |        |
| >R5000 (>~\$375)                      | 12 (8.2%)                    | 143 (14.3%)        | 0.017* | 22 (9.2%)                   | 133 (14.7%)        | 0.003* |
| Maternal education                    |                              |                    |        |                             |                    |        |
| Primary                               | 7 (4.8%)                     | 79 (7.9%)          |        | 14 (5.9%)                   | 72 (8.0%)          |        |
| Secondary                             | 91 (62.3%)                   | 518 (52.0%)        |        | 143 (59.8%)                 | 466 (51.6%)        |        |
| Completed secondary                   | 40 (27.4%)                   | 335 (33.6%)        |        | 70 (29.3%)                  | 305 (33.7%)        |        |
| Any tertiary                          | 8 (5.5%)                     | 65 (6.5%)          | 0.115  | 12 (5.0%)                   | 61 (6.8%)          | 0.134  |
| Maternal employment status (employed) | 41 (28.1%)                   | 266 (26.7%)        | 0.721  | 67 (28.0%)                  | 240 (26.6%)        | 0.645  |
| SES quartile                          |                              |                    |        |                             |                    |        |
| Lowest SES                            | 29 (19.9%)                   | 245 (24.6%)        |        | 46 (19.3%)                  | 228 (25.2%)        |        |
| Low-mod SES                           | 35 (24.0%)                   | 261 (26.2%)        |        | 66 (27.6%)                  | 230 (25.4%)        |        |
| Mod-high SES                          | 45 (30.8%)                   | 245 (24.6%)        |        | 69 (28.9%)                  | 221 (24.5%)        |        |
| High SES                              | 37 (25.3%)                   | 246 (24.7%)        | 0.334  | 58 (24.3%)                  | 225 (24.9%)        | 0.200  |

**Footnotes:**

\*p<0.05; Chi-squared for categorical variables (n and % proportions presented).

**Appendix Table 2:** Comparison of socioeconomic variables among children in the neuroimaging sub-group and those in DCHS follow up at 2 years (n=1002)

| Variables                             | Imaging & Neurodevelopment (n=146) |                    |          | Full imaging cohort (n=239) |                    |          |
|---------------------------------------|------------------------------------|--------------------|----------|-----------------------------|--------------------|----------|
|                                       | Imaging (n=146)                    | No Imaging (n=856) | <i>P</i> | Imaging (n=239)             | No Imaging (n=763) | <i>P</i> |
| Male sex                              | 84 (57.5%)                         | 429 (50.1%)        | 0.097    | 135 (56.5%)                 | 378 (49.5%)        | 0.061    |
| Monthly household income (ZAR)        |                                    |                    |          |                             |                    |          |
| < R1000 (<~\$75)                      | 48 (32.9%)                         | 338 (39.5%)        |          | 78 (32.6%)                  | 308 (40.4%)        |          |
| R1000-R5000 (~\$75-375)               | 86 (58.9%)                         | 406 (47.4%)        |          | 139 (58.2%)                 | 353 (46.3%)        |          |
| >R5000 (>~\$375)                      | 12 (8.2%)                          | 112 (13.15)        | 0.028*   | 22 (9.2%)                   | 102 (13.4%)        | 0.005*   |
| Maternal education                    |                                    |                    |          |                             |                    |          |
| Primary                               | 7 (4.8%)                           | 66 (7.7%)          |          | 14 (5.9%)                   | 59 (7.7%)          |          |
| Secondary                             | 91 (62.3%)                         | 458 (53.5%)        |          | 143 (59.8%)                 | 406 (53.2%)        |          |
| Completed secondary                   | 40 (27.4%)                         | 281 (32.8%)        |          | 70 (29.3%)                  | 251 (32.9%)        |          |
| Any tertiary                          | 8 (5.5%)                           | 51 (6.0%)          | 0.219    | 12 (5.0%)                   | 47 (6.2%)          | 0.324    |
| Maternal employment status (employed) | 41 (28.1%)                         | 223 (26.1%)        | 0.607    | 67 (28.0%)                  | 197 (25.8%)        | 0.498    |
| SES quartile                          |                                    |                    |          |                             |                    |          |
| Lowest SES                            | 29 (19.9%)                         | 213 (24.9%)        |          | 46 (19.3%)                  | 196 (25.7%)        |          |
| Low-mod SES                           | 35 (24.0%)                         | 233 (27.2%)        |          | 66 (27.6%)                  | 202 (26.5%)        |          |
| Mod-high SES                          | 45 (30.8%)                         | 208 (24.3%)        |          | 69 (28.9%)                  | 184 (24.1%)        |          |
| High SES                              | 37 (25.3%)                         | 202 (23.6%)        | 0.256    | 58 (24.3%)                  | 181 (23.7%)        | 0.182    |

**Footnotes:**

\*p<0.05; Chi-squared for categorical variables (n and % proportions presented).

**Appendix Table 3:** Associations of anatomical ROIs (cortical surface area and thickness) with either cognitive or language development adjusting for household income

|                               |          |            | Cognitive development (n=146) |        | Language development (n=138) |        |
|-------------------------------|----------|------------|-------------------------------|--------|------------------------------|--------|
| Cortical Surface Area         | Lobe     | Hemisphere | Beta coefficient (95% CI)     | P      | Beta coefficient (95% CI)    | P      |
| <b>Fusiform</b>               | Temporal | L          | 0.04 (-0.17 to 0.26)          | 0.685  | 0.27 (0.06 to 0.49)**        | 0.013* |
|                               |          | R          | 0.15 (-0.06 to 0.37)          | 0.157  | 0.26 (0.04 to 0.48)**        | 0.023* |
| <b>Insula</b>                 | Temporal | L          | -0.03 (-0.25 to 0.20)         | 0.815  | 0.09 (-0.14 to 0.33)         | 0.440  |
|                               |          | R          | 0.09 (-0.11 to 0.28)          | 0.398  | 0.21 (0.01 to 0.41)**        | 0.043* |
| <b>Lateral orbitofrontal</b>  | Frontal  | L          | 0.13 (-0.11 to 0.37)          | 0.282  | 0.25 (0.00 to 0.49)**        | 0.048* |
|                               |          | R          | 0.10 (-0.14 to 0.34)          | 0.421  | 0.28 (0.04 to 0.52)**        | 0.024* |
| <b>Paracentral</b>            | Frontal  | L          | -0.03 (-0.22 to 0.17)         | 0.785  | 0.12 (-0.08 to 0.32)         | 0.226  |
|                               |          | R          | -0.18 (-0.37 to 0.00)         | 0.051  | -0.12 (-0.31 to 0.07)        | 0.216  |
| Cortical Thickness            | Lobe     | Hemisphere | Beta coefficient (95% CI)     | P      | Beta coefficient (95% CI)    | P      |
| <b>Caudal middle frontal</b>  | Frontal  | L          | -0.22 (-0.38 to -0.07)**      | 0.005* | -0.17 (-0.33 to -0.01)       | 0.034* |
|                               |          | R          | -0.14 (-0.30 to 0.02)         | 0.075  | -0.12 (-0.28 to 0.05)        | 0.158  |
| <b>Lateral orbitofrontal</b>  | Frontal  | L          | -0.02 (-0.18 to 0.14)         | 0.829  | -0.01 (-0.17 to 0.15)        | 0.891  |
|                               |          | R          | -0.12 (-0.28 to 0.04)         | 0.126  | -0.19 (-0.35 to -0.03)       | 0.017* |
| <b>Medial orbitofrontal</b>   | Frontal  | L          | -0.19 (-0.35 to -0.03)        | 0.021* | -0.20 (-0.36 to -0.04)**     | 0.012* |
|                               |          | R          | -0.18 (-0.34 to -0.02)        | 0.032* | -0.29 (-0.45 to -0.13)**     | 0.001* |
| <b>Rostral middle frontal</b> | Frontal  | L          | -0.17 (-0.33 to -0.01)        | 0.038* | -0.10 (-0.27 to 0.06)        | 0.225  |
|                               |          | R          | -0.14 (-0.30 to 0.02)         | 0.083  | -0.20 (-0.36 to -0.04)**     | 0.018* |
| <b>Superior parietal</b>      | Parietal | L          | -0.15 (-0.32 to 0.01)         | 0.063  | -0.22 (-0.38 to -0.06)**     | 0.009* |
|                               |          | R          | 0.02 (-0.15 to 0.19)          | 0.856  | -0.08 (-0.26 to 0.09)        | 0.333  |
| <b>Supramarginal</b>          | Parietal | L          | -0.04 (-0.20 to 0.12)         | 0.618  | -0.05 (-0.22 to 0.12)        | 0.562  |
|                               |          | R          | -0.20 (-0.36 to -0.04)**      | 0.014* | -0.16 (-0.32 to 0.00)        | 0.056  |

**Footnote**

Table showing the ROIs with associations for cognitive and language development with cortical surface area and cortical thickness, if either hemisphere had  $p < 0.05$ . All linear regression models included child age, child sex and household income as covariates; associations with surface area also included intracranial volume. The beta (standardised) regression coefficient represents the effect size or expected change in cognitive or language development (in standard deviations) with a one unit standard deviation change in the region-of-interest. Beta coefficients are reported to 2 decimal places. \* $p < 0.05$ , \*\*absolute beta coefficient  $\geq 0.20$

**Appendix Table 4:** Associations of anatomical ROIs (cortical surface area and thickness) with either cognitive or language development (excluding outliers)

|                               |          |            | Cognitive development (n=144) |        | Language development (n=136) |        |
|-------------------------------|----------|------------|-------------------------------|--------|------------------------------|--------|
| Cortical Surface Area         | Lobe     | Hemisphere | Beta coefficient (95% CI)     | P      | Beta coefficient (95% CI)    | P      |
| <b>Fusiform</b>               | Temporal | L          | 0.02 (-0.20 to 0.24)          | 0.862  | 0.28 (0.06 to 0.50)**        | 0.014* |
|                               |          | R‡         | 0.15 (-0.08 to 0.38)          | 0.199  | 0.28 (0.05 to 0.52)**        | 0.019* |
| <b>Insula</b>                 | Temporal | L          | -0.05 (-0.28 to 0.18)         | 0.676  | 0.08 (-0.16 to 0.32)         | 0.503  |
|                               |          | R          | 0.07 (-0.13 to 0.28)          | 0.486  | 0.19 (-0.01 to 0.40)         | 0.067  |
| <b>Lateral orbitofrontal</b>  | Frontal  | L          | 0.12 (-0.13 to 0.36)          | 0.350  | 0.22 (-0.03 to 0.46)**       | 0.089  |
|                               |          | R          | 0.08 (-0.17 to 0.33)          | 0.522  | 0.27 (0.02 to 0.52)**        | 0.032* |
| <b>Paracentral</b>            | Frontal  | L          | -0.06 (-0.26 to 0.15)         | 0.579  | 0.11 (-0.10 to 0.31)         | 0.302  |
|                               |          | R          | -0.20 (-0.39 to -0.01)**      | 0.035* | -0.12 (-0.31 to 0.07)        | 0.221  |
| Cortical Thickness            | Lobe     | Hemisphere | Beta coefficient (95% CI)     | P      | Beta coefficient (95% CI)    | P      |
| <b>Caudal middle frontal</b>  | Frontal  | L          | -0.23 (-0.39 to -0.07)**      | 0.006* | -0.18 (-0.34 to -0.01)       | 0.034* |
|                               |          | R          | -0.12 (-0.29 to 0.04)         | 0.129  | -0.11 (-0.27 to 0.06)        | 0.198  |
| <b>Lateral orbitofrontal</b>  | Frontal  | L          | 0.00 (-0.16 to 0.16)          | 0.993  | 0.00 (-0.16 to 0.17)         | 0.968  |
|                               |          | R          | -0.11 (-0.27 to 0.05)         | 0.189  | -0.19 (-0.35 to -0.03)       | 0.020* |
| <b>Medial orbitofrontal</b>   | Frontal  | L          | -0.16 (-0.32 to -0.00)        | 0.049* | -0.20 (-0.36 to -0.04)**     | 0.015* |
|                               |          | R          | -0.16 (-0.32 to 0.01)         | 0.064  | -0.29 (-0.45 to -0.12)**     | 0.001* |
| <b>Rostral middle frontal</b> | Frontal  | L          | -0.14 (-0.30 to 0.02)         | 0.095  | -0.09 (-0.26 to 0.07)        | 0.263  |
|                               |          | R          | -0.12 (-0.28 to 0.04)         | 0.154  | -0.19 (-0.35 to -0.03)       | 0.021* |
| <b>Superior parietal</b>      | Parietal | L          | -0.11 (-0.27 to 0.06)         | 0.196  | -0.19 (-0.35 to -0.02)       | 0.026* |
|                               |          | R          | 0.03 (-0.14 to 0.20)          | 0.705  | -0.09 (-0.26 to 0.09)        | 0.329  |
| <b>Supramarginal</b>          | Parietal | L          | -0.00 (-0.17 to 0.16)         | 0.960  | -0.03 (-0.19 to 0.14)        | 0.736  |
|                               |          | R          | -0.18 (-0.34 to -0.02)        | 0.028* | -0.15 (-0.31 to 0.01)        | 0.073  |

**Footnote**

Table showing the ROIs with associations for cognitive and language development with cortical surface area and cortical thickness, if either hemisphere had  $p < 0.05$ . All linear regression models included child age and child sex as covariates; associations with surface area also included intracranial volume. The beta (standardised) regression coefficient represents the effect size or expected change in cognitive or language development (in standard deviations) with a one unit standard deviation change in the region-of-interest. ‡Right fusiform has  $n=143$  for the cortical surface area calculation as one outlier was excluded. \* $p < 0.05$ , \*\*absolute beta coefficient  $\geq 0.20$
